# Supplementary material for: Identification, Characterization and Full-Length Sequence Analysis of a Novel Polerovirus Associated with Wheat Leaf Yellowing Disease
Source: PubMed Central journal article supplement (PMC5592212; doi:10.3389/fmicb.2017.01689), 2017-09-06
Supplement: Presentation1.pdf [file Presentation1.pdf]

## *Supplementary Materials*

Identification, Characterization and Full-Length Sequence Analysis of a Novel

Polerovirus Associated with Wheat Leaf Yellowing Disease

Peipei Zhang, Yan Liu, Wenwen Liu, Mengji Cao, Sebastien Massart\*, Xifeng Wang\*

\*Corresponding author: [xfwang@ippcaas.cn](mailto:xfwang@ippcaas.cn); [sebastien.massart@ulg.ac.be](mailto:sebastien.massart@ulg.ac.be)

**TABLE S1 | All primers used in this study**

| Function                           | Primer  | Sequence (5' to 3')         | Size (bp) |
|------------------------------------|---------|-----------------------------|-----------|
| Detection of known viruses         | GAV-F   | ATGAATTCAGTAGGCCGTAGAA      | 960       |
|                                    | GAV-R   | GTCTCGGTTTCCTCCAATGTG       |           |
|                                    | GPV-F   | GTAGACGCGGAACCCGGT          | 920       |
|                                    | GPV-R   | AAAGACGAGTTCGCCGAAG         |           |
|                                    | PAV-F   | ATGAATTCAGTAGGCCGTAGGGGAC   | 501       |
|                                    | PAV-R   | TCACCGATGTCGCCTGGAAC        |           |
| Contig validation                  | 1F      | GGAAAGCCTGCTCTGGAC          | 928       |
|                                    | 1R      | GTGGTCGGCAATTTCTTC          |           |
|                                    | 2F      | CACTGGTGGGAAATGGTC          | 509       |
|                                    | 2R      | ACTTGTCTGTTCCGGCTTGT        |           |
|                                    | 3F      | GGGAACCGCACAAAGCAGA         | 571       |
|                                    | 3R      | GGAGACTCAAGCGCATCG          |           |
|                                    | 4F      | GGACCTGGAGGAAGAAGC          | 989       |
|                                    | 4R      | CCATCACCTGTTGCGTCT          |           |
| Fill gaps                          | 1-2F    | TATTGGAACGGCAAGACC          | 262       |
|                                    | 1-2R    | TTTCCCACCAGTGTTTACC         |           |
|                                    | 2-3F    | TCATCTCAGAGCACCCAG          | 658       |
|                                    | 2-3R    | TCTGTGGATAAGCCGAAT          |           |
|                                    | 3-4F    | ATGGAGGTGCGTAATGCC          | 619       |
|                                    | 3-4R    | CAGATTTACCACGATTTGAC        |           |
| RACE                               | 5'-GSP1 | CCACAGGGTTGTCTTC            |           |
|                                    | 5'-GSP2 | CGCTCAAGAGGCAAAATGTC        |           |
|                                    | 5'-GSP3 | TCGCCATAGGTTAGATTCAA        |           |
|                                    | 3'-GSP2 | GATTCCAAAGTGGCGGGTCA        |           |
|                                    | 3'-GSP3 | AGACGCAACAGGTGATGGGT        |           |
| Infectious cDNA clone construction | A-Stu-F | aggcctGACTAAAGAAACTACGGGGGA | 3059      |
|                                    | A-Nco-R | CATCGTCTCccatggCTATCGCCCA   |           |
|                                    | B-Nco-F | TGGGCGATAGccatggGAGACGATG   | 2739      |
|                                    | B-Sal-R | gtcgacGTTATCTTTTTACTAGGAA   |           |
| Detection of WLYaV                 | CP-F    | ATGAATACGGGAGGTAACCGCA      | 570       |
|                                    | CP-R    | CTATTTAGGGTTCTGGAATTGA      |           |

F: forward

R: reverse

**TABLES2 | Virus abbreviations and GenBank accession numbers used for identity and phylogenetic analyses in this study**

| Genus              | Virus                              | Abbreviation | GenBank<br>Accession No. |
|--------------------|------------------------------------|--------------|--------------------------|
|                    | Beet chlorosis virus               | BChV         | NC_002766.1              |
|                    | Beet mild yellowing virus          | BMYV         | NC_003491.1              |
|                    | Beet western yellows virus         | BWYV         | NC_004756.1              |
|                    | Carrot red leaf virus              | CtRLV        | NC_006265.1              |
|                    | Cereal yellow dwarf virus-RPS      | CYDV-RPS     | NC_002198.2              |
|                    | Cereal yellow dwarf virus-RPV      | CYDV-RPV     | NC_004751.1              |
|                    | Chickpea chlorotic stunt virus     | CpCSV        | NC_008249.1              |
|                    | Cotton leafroll dwarf virus        | CoLRDV       | NC_014545.1              |
| <i>Polerovirus</i> | Cucurbit aphid-borne yellows virus | CABYV        | NC_003688.1              |
|                    | Maize yellow dwarf virus-RMV       | MYDV-RMV     | NC_021484.1              |
|                    | Melon aphid-borne yellows virus    | MABYV        | NC_010809.1              |
|                    | Pepper vein yellows virus          | PVYV         | NC_015050.1              |
|                    | Potato leafroll virus              | PLRV         | NC_001747.1              |
|                    | Suakwa aphid-borne yellows virus   | SwABYV       | NC_018571.2              |
|                    | Sugarcane yellow leaf virus        | ScYLV        | NC_000874.1              |
|                    | Tobacco vein distorting virus      | TVDV         | NC_010732.1              |
|                    | Turnip yellows virus               | TuYV         | NC_003743.1              |
| <i>Enamovirus</i>  | Pea enation mosaic virus-1         | PEMV-1       | NC_003629.1              |
|                    | Barley yellow dwarf virus Ker-II   | BYDV         | NC_021481.1              |
|                    | Barley yellow dwarf virus - MAV    | BYDV-MAV     | NC_003680.1              |
|                    | Barley yellow dwarf virus-PAS      | BYDV-PAS     | NC_002160.2              |
| <i>Luteovirus</i>  | Barley yellow dwarf virus-PAV      | BYDV-PAV     | NC_004750.1              |
|                    | Bean leafroll virus                | BLRV         | NC_003369.1              |
|                    | Rose spring dwarf-associated virus | RSDaV        | NC_010806.1              |
|                    | Soybean dwarf virus                | SbDV         | NC_003056.1              |
| Unassigned         | Wheat yellow dwarf virus-GPV       | WYDV-GPV     | NC_012931.1              |

**TABLE S3 | Detection of known virus in the wheat samples collected from Jinan, China by RT-PCR**

| Sample | BYDV-GAV | BYDV-PAV | WYDV-GPV | WLYaV |
|--------|----------|----------|----------|-------|
| 1      |          | √        |          |       |
| 2      | √        |          |          |       |
| 3      |          |          |          | √     |
| 4      |          | √        |          |       |
| 5      |          |          |          |       |
| 6      | √        |          |          |       |
| 7      |          |          | √        |       |
| 8      |          |          |          |       |
| 9      |          | √        |          |       |
| 10     | √        |          |          |       |
| 11     |          | √        |          |       |
| 12     |          |          |          |       |

√: Positive

**TABLE S4 | Identities (%) of WLYaV with ten representative ScYLV isolates**

| Isolate     | Accession No. | Full-length<br>nt | ORF3<br>aa |
|-------------|---------------|-------------------|------------|
| REU-YL1a    | AM072754.1    | 63.8              | 86.2       |
| IND         | AY236971.1    | 65.0              | 86.2       |
| PER-YL1a    | AM072752.1    | 63.7              | 85.7       |
| BRA-YL1     | AM072750.1    | 63.8              | 85.2       |
| Haw87-4094  | GU570006.1    | 65.3              | 86.2       |
| CBLK97154   | KF680098.1    | 65.1              | 85.7       |
| CHN1        | GU327735.1    | 64.7              | 85.7       |
| CHN-GD-ZJ15 | HQ245320.1    | 64.6              | 86.2       |
| GZ-GZ18     | KF477092.1    | 65.1              | 85.2       |
| USA         | NC_000874.1   | 64.9              | 86.2       |

nt: nucleotide; aa: amino acid

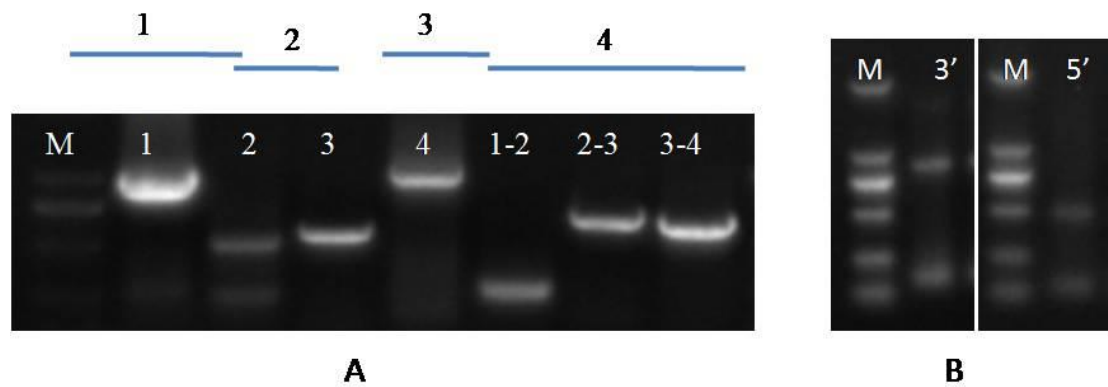

**FIGURE S1 | Completion of full-length genome of wheat leaf yellowing associated virus (WLYaV) by RT-PCR and RACE-PCR. (A)** Confirmation of assembled contigs and gap filling by RT-PCR, blue bars above the electrophoretogram: 4 contigs having high identities with viruses in *Luteoviridae* with the length of 1 151, 701, 718 and 1 714 nt respectively, the putative relative positions of the contigs were determined by aligning the contigs with their closest viral genome (sugarcane yellow leaf virus (ScYLV), AF157029.1), M: DL 2,000 DNA marker, 1 to 4 correspond to the 4 assembled contigs, 1-2, 2-3 and 3-4 correspond to amplicons produced to fill the gaps and had more than 70 nt overlap; **(B)** Analysis of terminal sequences by 5' and 3' RACE. Finally, all the PCR products were sequenced and assembled to full-length genome of WLYaV using DNAMAN program (V.6).

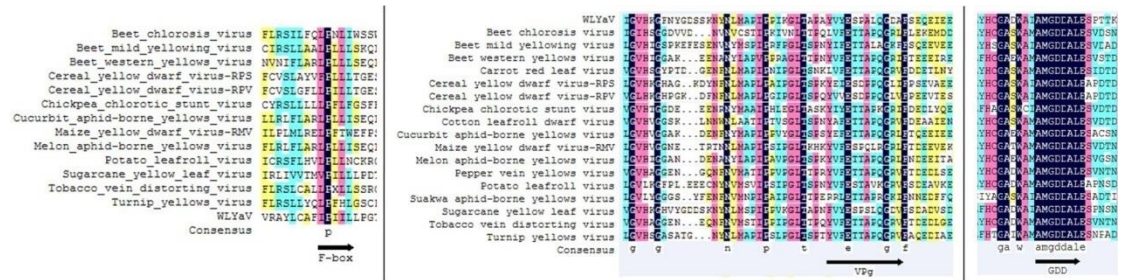

**FIGURE S2 | Multiple alignments of amino acid sequences of P0, P1 and P2 from several poleroviruses.** The positions of the F-box, VPg and RNA dependent RNA polymerase signature GDD are highlighted with arrows. F-box Motif in ORF0: LPxxL/I, which is conserved in the poleroviruses. VPg Motif in ORF 1: the Glu residue (e) corresponds to the protease cleavage site. GDD Motif in ORF 2: is conserved in family *Luteoviridae*.

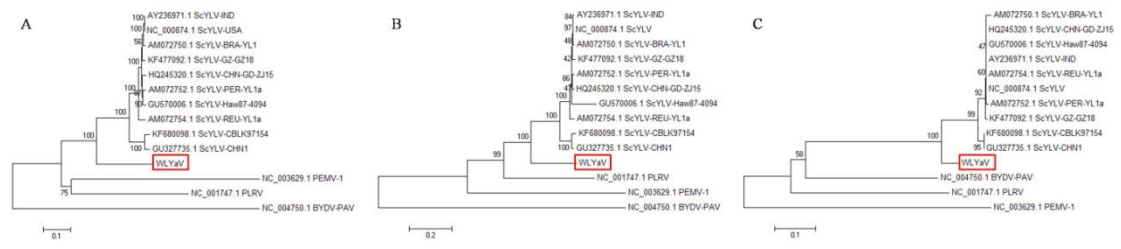

**FIGURE S3 | Phylogenetic analysis of WLYaV with ten representative ScYLV isolates.** Phylogenetic tree of (A) complete genome nucleotide sequences, deduced (B) RdRp and (C) CP amino acid sequences.
